# Supplementary material for: A High-Resolution Whole-Genome Map of Key Chromatin Modifications in the Adult Drosophila melanogaster
Source: PubMed Central journal article supplement (PMC3240582; doi:10.1371/journal.pgen.1002380), 2011-12-15
Supplement: pgen.1002380.s003.pdf [file pgen.1002380.s003.pdf]

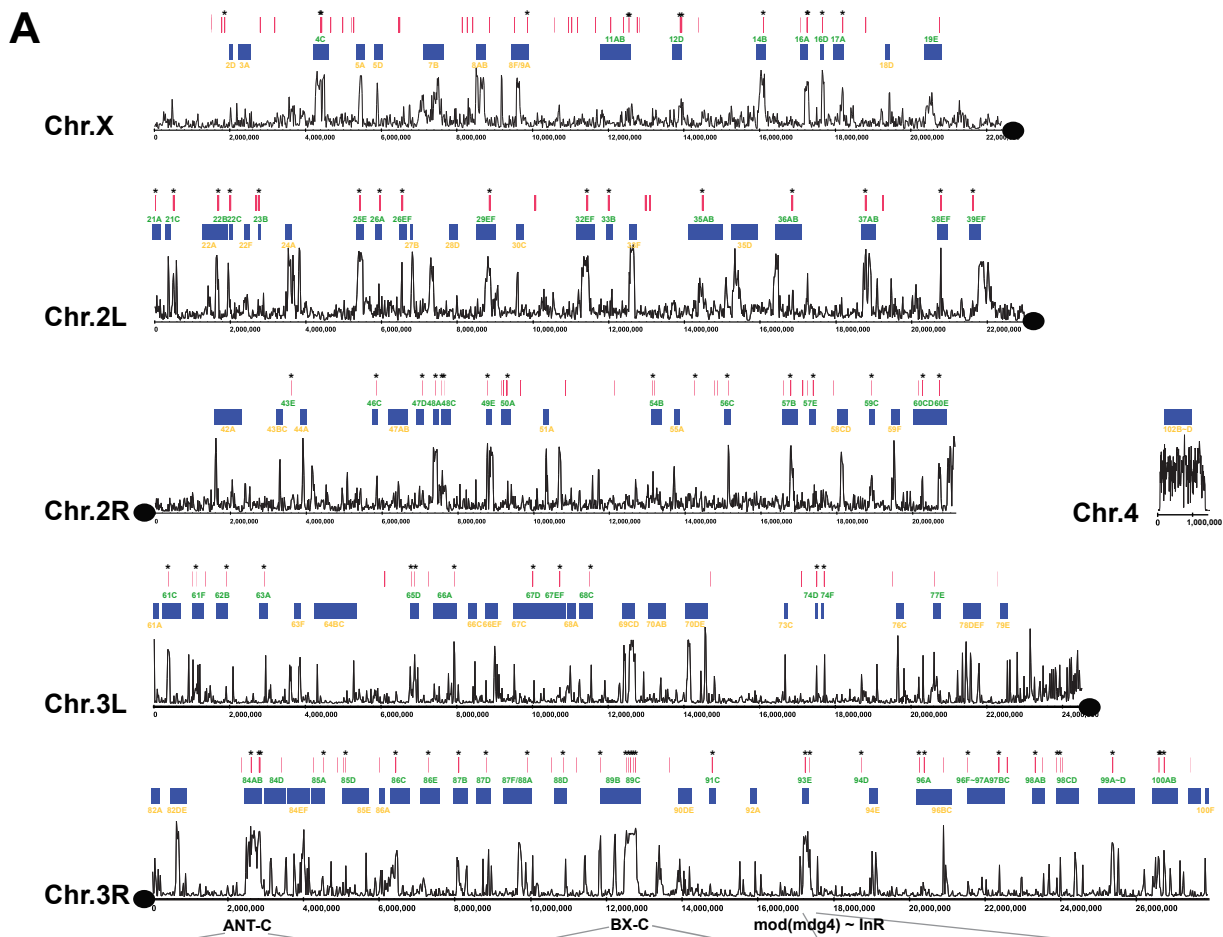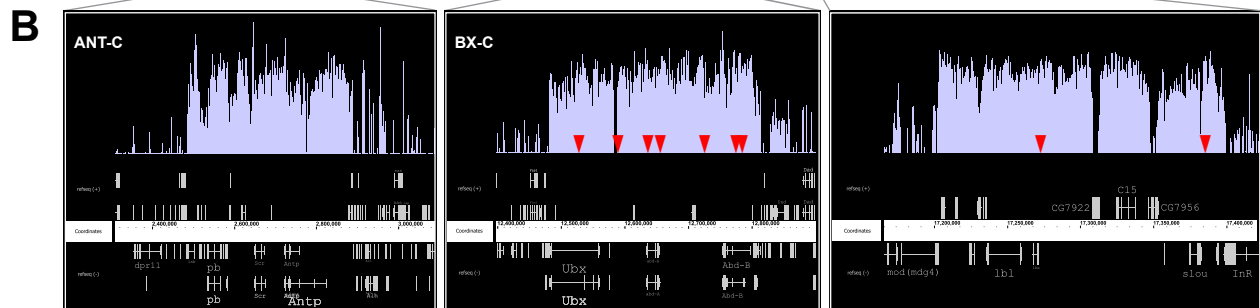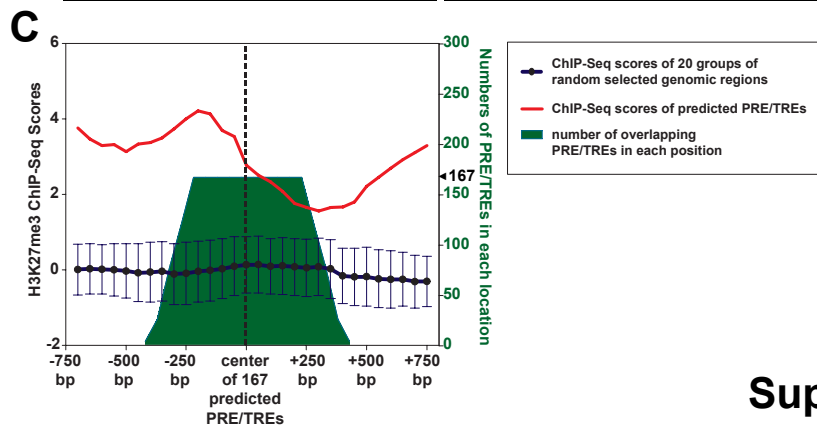

Supplementary Figure S3
