# Supplementary material for: A High-Resolution Whole-Genome Map of Key Chromatin Modifications in the Adult Drosophila melanogaster
Source: PubMed Central journal article supplement (PMC3240582; doi:10.1371/journal.pgen.1002380), 2011-12-15
Supplement: pgen.1002380.s005.pdf [file pgen.1002380.s005.pdf]

**Table S2. H3K27me3-Enriched Genomic Regions**

| #  | Chr | Start      | End        | Cytoband     | Included genes                                                           |
|----|-----|------------|------------|--------------|--------------------------------------------------------------------------|
| 1  | X   | 4,264,600  | 4,514,600  | 4C2 – 4C10   | from <i>CG12688</i> to <i>pebbled</i>                                    |
| 2  | X   | 5,404,145  | 5,509,399  | 5A2 – 5A7    | from <i>CG12730</i> to <i>CG4136</i>                                     |
| 3  | X   | 5,886,921  | 5,933,880  | 5D1 – 5D2    | from <i>CG4766</i> to <i>roughex</i>                                     |
| 4  | X   | 7,453,789  | 7,537,367  | 7B4 – 7B5    | from <i>CG11369</i> to <i>cut</i>                                        |
| 5  | X   | 8,499,811  | 8,571,154  | 7F8 – 8A1    | from <i>caf1-180</i> to <i>CG12772</i>                                   |
| 6  | X   | 8,615,374  | 8,729,815  | 8A3 – 8B2    | <i>Lim1</i>                                                              |
| 7  | X   | 9,176,154  | 9,210,701  | 8D5 – 8D6    | <i>lozenge</i>                                                           |
| 8  | X   | 9,578,305  | 9,672,630  | 8F9 – 9A1    | from <i>buttonhead</i> to <i>CG1354</i>                                  |
| 9  | X   | 15,955,928 | 16,142,413 | 14A8 – 14B5  | from <i>Tob</i> to <i>disconnected</i>                                   |
| 10 | X   | 17,199,002 | 17,312,249 | 16A1 – 16A5  | from <i>CG5445</i> to <i>CG8611</i>                                      |
| 11 | X   | 17,645,348 | 17,715,872 | 16C8 – 16D4  | from <i>unc-4</i> to <i>Socs16D</i>                                      |
| 12 | X   | 18,171,104 | 18,220,640 | 17A4 – 17A5  | from <i>unpaired3</i> to <i>CG6023</i>                                   |
| 13 | 2L  | 365,460    | 403,965    | 21C1 – 21C2  | from <i>aristales</i> to <i>RNA polymerase I 135kD subunit</i>           |
| 14 | 2L  | 490,193    | 529,795    | 21D2 – 21E1  | <i>u-shaped</i>                                                          |
| 15 | 2L  | 576,945    | 602,773    | 21E2         | from <i>Pvull-PstI</i> homology 13 to <i>CG13689</i>                     |
| 16 | 2L  | 1,618,334  | 1,704,688  | 22A3 – 22B1  | <i>CG31666</i>                                                           |
| 17 | 2L  | 1,942,442  | 1,974,262  | 22B6 – 22B8  | from <i>CG33673</i> to <i>CG10908</i>                                    |
| 18 | 2L  | 3,530,332  | 3,706,345  | 24A4 – 24C1  | from <i>drumstick</i> to <i>CG31778</i>                                  |
| 19 | 2L  | 3,813,067  | 3,862,929  | 24C5 – 24C8  | <i>sloppy paired 1</i> , <i>sloppy paired 2</i>                          |
| 20 | 2L  | 5,370,948  | 5,516,778  | 25D7 – 25E5  | from <i>no mechanoreceptor potential C</i> to <i>CG14020</i>             |
| 21 | 2L  | 6,526,157  | 6,557,925  | 26E1 – 26E3  | from <i>CG31637</i> to <i>osm-6</i>                                      |
| 22 | 2L  | 6,791,189  | 6,852,475  | 27B1 – 27C1  | from <i>nrv nervana 2</i> to <i>Regulator of cyclin A1</i>               |
| 23 | 2L  | 7,276,810  | 7,383,183  | 27F1 – 27F3  | from <i>wingless</i> to <i>neither inactivation nor afterpotential C</i> |
| 24 | 2L  | 8,733,913  | 8,913,030  | 29E6 – 29F3  | from <i>raw</i> to <i>CG34398</i>                                        |
| 25 | 2L  | 9,575,541  | 9,617,440  | 30B12 – 30C1 | from <i>CG4389</i> to <i>GlcAT-S</i>                                     |
| 26 | 2L  | 11,285,629 | 11,502,330 | 32E2 – 32F2  | from <i>Osiris 21</i> to <i>CG6488</i>                                   |
| 27 | 2L  | 12,546,538 | 12,688,682 | 33E9 – 33F3  | from <i>bun</i> to <i>POU domain protein 2</i>                           |
| 28 | 2L  | 14,371,166 | 14,598,857 | 35B1 – 35B3  | from <i>pickpocket</i> to <i>CG3473</i>                                  |
| 29 | 2L  | 15,070,253 | 15,113,130 | 35C1 – 35C2  | from <i>vasa</i> to <i>CG15269</i>                                       |

| #  | Chr | Start      | End        | Cytoband     | Included genes                                                                        |
|----|-----|------------|------------|--------------|---------------------------------------------------------------------------------------|
| 30 | 2L  | 15,271,526 | 15,502,007 | 35D1 – 35D2  | from <i>CG15261</i> to <i>Translocase inner membrane 17</i>                           |
| 31 | 2L  | 16,352,576 | 16,491,639 | 35F12 – 36A2 | from <i>CaBP1</i> to <i>CG4580</i>                                                    |
| 32 | 2L  | 18,722,205 | 18,938,718 | 37A1 – 37B6  | from <i>CG15167</i> to <i>CG18397</i>                                                 |
| 33 | 2L  | 20,766,705 | 20,788,538 | 38E8 – 38E10 | from <i>diaphanous</i> to <i>Pomp</i>                                                 |
| 34 | 2L  | 21,753,202 | 22,081,341 | 40A1– 40E2   | from <i>CG31612</i> to <i>CG6691</i>                                                  |
| 35 | 2R  | 1,592,648  | 1,641,028  | 41F8 – 41F9  | from <i>vulcan</i> to <i>1(2)09851</i>                                                |
| 36 | 2R  | 3,294,313  | 3,323,158  | 43B2 – 43C1  | from <i>CG11166</i> to <i>sine oculis</i>                                             |
| 37 | 2R  | 3,904,824  | 3,941,529  | 44A2 – 44A4  | from <i>CG14762</i> to <i>CG12761</i>                                                 |
| 38 | 2R  | 7,349,619  | 7,466,616  | 47F14 – 48A2 | from <i>Enhancer of Polycomb</i> to <i>toutatis</i>                                   |
| 39 | 2R  | 8,759,535  | 8,804,006  | 49D6 – 49E1  | from <i>CG3790</i> to <i>1(2)01424</i>                                                |
| 40 | 2R  | 8,831,603  | 8,932,240  | 49E3 – 49F1  | from <i>Multi drug resistance 49</i> to <i>CG13323</i>                                |
| 41 | 2R  | 10,321,885 | 10,396,090 | 51A2 – 51A4  | from <i>phyllopod</i> to <i>CG17390</i>                                               |
| 42 | 2R  | 10,663,090 | 10,730,990 | 51C2 – 51C5  | from <i>knot</i> to <i>Na<sup>+</sup>-dependent inorganic phosphate cotransporter</i> |
| 43 | 2R  | 15,130,374 | 15,165,327 | 56C4 – 56C6  | from <i>coracle</i> to <i>ribbon</i>                                                  |
| 44 | 2R  | 16,770,193 | 16,862,723 | 57B4 – 57B5  | from <i>orthopedia</i> to <i>CG34115</i>                                              |
| 45 | 2R  | 18,104,965 | 18,183,183 | 58D2 – 58D3  | from <i>CG30278</i> to <i>CG5819</i>                                                  |
| 46 | 2R  | 19,454,116 | 19,554,762 | 59F1– 59F5   | from <i>apontic</i> to <i>Phosphodiesterase 8</i>                                     |
| 47 | 2R  | 20,926,066 | 21,028,144 | 60F1 – 60F5  | from <i>Neuropeptide-like precursor 1</i> to <i>Tyrosine kinase-related protein</i>   |
| 48 | 3L  | 365,771    | 434,930    | 61C1         | from <i>tracheiless</i> to <i>klarsicht</i>                                           |
| 49 | 3L  | 3,616,564  | 3,644,352  | 63E5         | from <i>CG10357</i> to <i>CG12029</i>                                                 |
| 50 | 3L  | 3,840,607  | 3,896,783  | 63F3 – 63F5  | from <i>Arrowhead</i> to <i>Gustatory receptor 63a</i>                                |
| 51 | 3L  | 6,754,926  | 6,987,284  | 65C4 – 65D6  | from <i>CG32392</i> to <i>binou</i>                                                   |
| 52 | 3L  | 7,929,219  | 7,964,031  | 66A20 –66A21 | from <i>Srp9</i> to <i>Ribonuclease X25</i>                                           |
| 53 | 3L  | 8,995,036  | 9,040,469  | 66F1 – 66F3  | from <i>CG5087</i> to <i>CG5144</i>                                                   |
| 54 | 3L  | 12,410,626 | 12,464,736 | 69B5 – 69C2  | from <i>GTPase-activating protein 69C</i> to <i>CG10616</i>                           |
| 55 | 3L  | 12,566,012 | 12,728,474 | 69C8 – 69D6  | from <i>araucan</i> to <i>small nuclear ribonucleoprotein at 69D</i>                  |
| 56 | 3L  | 14,076,125 | 14,183,875 | 70D2 – 70D3  | from <i>CG8100</i> to <i>nanchung</i>                                                 |
| 57 | 3L  | 14,555,711 | 14,612,135 | 70E2 – 70E4  | from <i>CG34039</i> to <i>shade</i>                                                   |
| 58 | 3L  | 19,636,298 | 19,678,333 | 76B11 – 76C1 | from <i>Ornithine aminotransferase precursor</i> to <i>CG8765</i>                     |
| 59 | 3L  | 20,533,576 | 20,712,097 | 77D1 – 77E3  | from <i>CG4786</i> to <i>CG13253</i>                                                  |

| #  | Chr | Start      | End        | Cytoband      | Included genes                                                                |
|----|-----|------------|------------|---------------|-------------------------------------------------------------------------------|
| 60 | 3L  | 21,442,007 | 21,477,597 | 78D2 – 78D3   | from <i>Syntaxin 7</i> to <i>crocodile</i>                                    |
| 61 | 3L  | 21,568,985 | 21,602,830 | 78D7 – 78E1   | from <i>CG32441</i> to <i>AP-2</i>                                            |
| 62 | 3L  | 21,758,442 | 21,818,290 | 78F1 – 78F3   | from <i>Syntrophin-like 1</i> to <i>Cyclin H</i>                              |
| 63 | 3R  | 646,523    | 732,329    | 82D6 – 82E2   | from <i>CG14657</i> to <i>Germ line transcription factor 1</i>                |
| 64 | 3R  | 2,485,947  | 2,888,201  | 84A1 – 84B2   | from <i>labial</i> to <i>CG1988</i>                                           |
| 65 | 3R  | 3,125,740  | 3,175,059  | 84D3 – 84D5   | from <i>rotund</i> to <i>nuclear export factor 4</i>                          |
| 66 | 3R  | 3,750,304  | 3,794,138  | 84E5 – 84E6   | <i>doublesex</i>                                                              |
| 67 | 3R  | 3,953,417  | 4,165,317  | 84E13 – 84F13 | from <i>CG7891</i> to <i>CG9603</i>                                           |
| 68 | 3R  | 6,241,765  | 6,501,354  | 86B4 – 86C4   | from <i>CG6345</i> to <i>CG6465</i>                                           |
| 69 | 3R  | 8,049,047  | 8,173,498  | 87B3 – 87B7   | from <i>CG17404</i> to <i>CG10038</i>                                         |
| 70 | 3R  | 8,882,095  | 8,905,013  | 87D11         | <i>single-minded</i>                                                          |
| 71 | 3R  | 9,666,675  | 9,784,442  | 88A1 – 88A3   | from <i>CG31495</i> to <i>Inositol polyphosphate 1-phosphatase</i>            |
| 72 | 3R  | 11,809,275 | 11,869,670 | 89A11 – 89B1  | from <i>serpent</i> to <i>pannier</i>                                         |
| 73 | 3R  | 12,186,970 | 12,258,657 | 89B14 – 89B16 | from <i>CG14880</i> to <i>CG31279</i>                                         |
| 74 | 3R  | 12,480,296 | 12,814,366 | 89D6 – 89E6   | from <i>Ultrabithorax</i> to <i>CG18622</i>                                   |
| 75 | 3R  | 17,203,138 | 17,399,241 | 93D9 – 93E4   | from <i>mod(mdg4)</i> to <i>Insulin-like receptor</i>                         |
| 76 | 3R  | 18,953,981 | 19,174,298 | 94E1 – 94E13  | from <i>hedgehog</i> to <i>pointed</i>                                        |
| 77 | 3R  | 20,901,945 | 21,014,952 | 96B20 – 96C4  | from <i>CG11920</i> to <i>distal antenna</i>                                  |
| 78 | 3R  | 24,369,978 | 24,428,240 | 98D4 – 98D6   | from <i>CG12413</i> to <i>Heterogeneous nuclear ribonucleoprotein at 98DE</i> |
| 79 | 3R  | 25,328,898 | 25,417,783 | 99B2 – 99B4   | from <i>Trc8</i> to <i>alphabet</i>                                           |
| 80 | 3R  | 25,511,345 | 25,542,461 | 99B7 – 99B8   | from <i>Odorant-binding protein 99c</i> to <i>Odorant-binding protein 99b</i> |
| 81 | 3R  | 26,426,900 | 26,919,136 | 100A1 – 100B2 | from <i>CG2246</i> to <i>Sox100B</i>                                          |
| 82 | 4   | 502,307    | 565,644    | 102C1 – 102C4 | <i>Asator</i> , <i>Zfh2</i>                                                   |
| 83 | 4   | 715,271    | 796,484    | 102D4 – 102E1 | from <i>Myoglianin</i> to <i>bent</i>                                         |
| 84 | 4   | 820,302    | 876,918    | 102E1 – 102E5 | from <i>CG11231</i> to <i>CG11148</i>                                         |
| 85 | 4   | 978,663    | 1,029,391  | 102F4 – 102F5 | from <i>CG32016</i> to <i>twin of eyeless</i>                                 |
| 86 | 4   | 1,103,365  | 1,133,637  | 102F8         | from <i>Activin-β</i> to <i>shaven</i>                                        |
