# Supplementary material for: A High-Resolution Whole-Genome Map of Key Chromatin Modifications in the Adult Drosophila melanogaster
Source: PLoS Genet. 2011 Dec 15;7(12):e1002380. doi: 10.1371/journal.pgen.1002380 (PMC3240582; doi:10.1371/journal.pgen.1002380)
Supplement: Table S3 — GO Term Enrichment Analysis of Gene Clusters. (PDF) [file pgen.1002380.s006.pdf]

**Table S3. GO Term Enrichment Analysis of Gene Clusters**

**Cluster A.**

| Category        | GO term                                       | Count | %   | P-value  | Fold of enrichment |
|-----------------|-----------------------------------------------|-------|-----|----------|--------------------|
| SP_PIR_KEYWORDS | alternative splicing                          | 121   | 7.4 | 8.60E-39 | 3.8                |
| SP_PIR_KEYWORDS | membrane                                      | 152   | 9.3 | 3.70E-26 | 2.4                |
| SP_PIR_KEYWORDS | Developmental protein                         | 100   | 6.1 | 2.00E-25 | 3.1                |
| SP_PIR_KEYWORDS | transmembrane                                 | 131   | 8   | 4.40E-19 | 2.2                |
| GOTERM_BP       | imaginal disc development                     | 113   | 6.9 | 4.50E-17 | 2.2                |
| SP_PIR_KEYWORDS | oxidoreductase                                | 85    | 5.2 | 6.70E-16 | 2.6                |
| SP_PIR_KEYWORDS | dna-binding                                   | 79    | 4.8 | 1.00E-15 | 2.7                |
| GOTERM_BP       | metamorphosis                                 | 100   | 6.1 | 3.30E-15 | 2.2                |
| GOTERM_BP       | larval development (sensu Amphibia)           | 100   | 6.1 | 3.30E-15 | 2.2                |
| SP_PIR_KEYWORDS | signal                                        | 75    | 4.6 | 4.00E-15 | 2.7                |
| GOTERM_BP       | cell morphogenesis                            | 127   | 7.8 | 5.10E-15 | 2                  |
| GOTERM_BP       | imaginal disc morphogenesis                   | 96    | 5.9 | 6.60E-15 | 2.2                |
| GOTERM_BP       | wing disc development                         | 66    | 4   | 8.40E-15 | 2.7                |
| SP_PIR_KEYWORDS | hydrolase                                     | 149   | 9.1 | 1.00E-14 | 1.9                |
| SP_PIR_KEYWORDS | glycoprotein                                  | 71    | 4.3 | 1.20E-14 | 2.7                |
| GOTERM_BP       | organ morphogenesis                           | 109   | 6.7 | 1.10E-13 | 2                  |
| GOTERM_BP       | imaginal disc-derived appendage morphogenesis | 64    | 3.9 | 1.90E-13 | 2.6                |
| SP_PIR_KEYWORDS | Transcription regulation                      | 62    | 3.8 | 4.30E-13 | 2.8                |
| GOTERM_BP       | wing disc morphogenesis                       | 59    | 3.6 | 5.40E-13 | 2.7                |
| GOTERM_BP       | imaginal disc-derived wing morphogenesis      | 58    | 3.6 | 9.10E-13 | 2.7                |
| SP_PIR_KEYWORDS | transferase                                   | 103   | 6.3 | 1.00E-12 | 2.1                |
| GOTERM_BP       | tissue development                            | 81    | 5   | 2.00E-12 | 2.2                |
| UP_SEQ_FEATURE  | splice variant                                | 106   | 6.5 | 3.30E-12 | 1.8                |
| SP_PIR_KEYWORDS | Transcription                                 | 59    | 3.6 | 1.60E-11 | 2.6                |
| SP_PIR_KEYWORDS | metal-binding                                 | 102   | 6.2 | 4.40E-11 | 2                  |
| SP_PIR_KEYWORDS | DNA binding                                   | 31    | 1.9 | 1.10E-10 | 3.9                |
| SP_PIR_KEYWORDS | nucleus                                       | 100   | 6.1 | 4.70E-10 | 1.9                |
| SP_PIR_KEYWORDS | nucleotide-binding                            | 94    | 5.8 | 2.00E-09 | 1.9                |

|                 |                                                       |    |     |          |     |
|-----------------|-------------------------------------------------------|----|-----|----------|-----|
| SP_PIR_KEYWORDS | zinc                                                  | 79 | 4.8 | 2.10E-09 | 2   |
| GOTERM_CC       | cell junction                                         | 30 | 1.8 | 4.70E-09 | 3.3 |
| GOTERM_BP       | gland development                                     | 48 | 2.9 | 6.30E-09 | 2.4 |
| GOTERM_BP       | salivary gland development                            | 43 | 2.6 | 8.50E-09 | 2.5 |
| SP_PIR_KEYWORDS | kinase                                                | 48 | 2.9 | 1.10E-08 | 2.5 |
| GOTERM_BP       | eye development                                       | 62 | 3.8 | 1.40E-08 | 2.1 |
| GOTERM_BP       | eye-antennal disc development                         | 57 | 3.5 | 1.90E-08 | 2.2 |
| GOTERM_CC       | adherens junction                                     | 25 | 1.5 | 2.10E-08 | 3.5 |
| GOTERM_BP       | regulation of tube architecture, open tracheal system | 20 | 1.2 | 2.20E-08 | 4.2 |
| GOTERM_BP       | ectoderm development                                  | 45 | 2.8 | 2.80E-08 | 2.4 |
| GOTERM_BP       | sensory organ development                             | 72 | 4.4 | 3.00E-08 | 1.9 |
| SP_PIR_KEYWORDS | cytoplasm                                             | 50 | 3.1 | 3.10E-08 | 2.3 |
| GOTERM_BP       | eye-antennal disc morphogenesis                       | 55 | 3.4 | 3.50E-08 | 2.2 |
| GOTERM_BP       | establishment and/or maintenance of cell polarity     | 34 | 2.1 | 5.70E-08 | 2.7 |
| GOTERM_BP       | cell part morphogenesis                               | 70 | 4.3 | 9.10E-08 | 1.9 |
| GOTERM_BP       | cell projection morphogenesis                         | 70 | 4.3 | 9.10E-08 | 1.9 |
| GOTERM_BP       | cell projection organization and biogenesis           | 70 | 4.3 | 9.10E-08 | 1.9 |

### Cluster B.

| Category  | GO term                            | Count | %   | P-value  | Fold of enrichment |
|-----------|------------------------------------|-------|-----|----------|--------------------|
| GOTERM_MF | serine-type endopeptidase activity | 9     | 5.2 | 4.10E-03 | 3.4                |
| GOTERM_BP | proteolysis                        | 12    | 6.9 | 5.70E-03 | 2.5                |
| GOTERM_MF | steroid hormone receptor activity  | 3     | 1.7 | 7.90E-03 | 21.6               |

**Cluster C.**

| Category  | GO term                              | Count | %    | P-value  | Fold of enrichment |
|-----------|--------------------------------------|-------|------|----------|--------------------|
| GOTERM_CC | cytoplasmic part                     | 95    | 20.6 | 6.00E-10 | 1.7                |
| GOTERM_CC | cytoplasm                            | 106   | 23   | 9.20E-09 | 1.6                |
| GOTERM_CC | cytosolic ribosome (sensu Eukaryota) | 17    | 3.7  | 1.10E-08 | 6.1                |
| GOTERM_CC | ribosomal subunit                    | 22    | 4.8  | 2.00E-08 | 4.4                |
| GOTERM_CC | macromolecular complex               | 88    | 19.1 | 4.80E-08 | 1.7                |
| GOTERM_CC | ribosome                             | 24    | 5.2  | 5.00E-08 | 3.8                |
| GOTERM_MF | structural constituent of ribosome   | 24    | 5.2  | 5.10E-08 | 3.9                |

**Cluster D.**

| Category     | GO term                              | Count | %    | P-value  | Fold of enrichment |
|--------------|--------------------------------------|-------|------|----------|--------------------|
| GOTERM_CC    | cytosolic ribosome (sensu Eukaryota) | 27    | 3    | 2.40E-12 | 5.2                |
| GOTERM_CC    | cytosolic part                       | 28    | 3.1  | 4.40E-10 | 4.1                |
| GOTERM_MF    | protein binding                      | 376   | 42.3 | 9.00E-09 | 1.2                |
| GOTERM_CC    | ribosomal subunit                    | 30    | 3.4  | 3.10E-08 | 3.2                |
| KEGG_PATHWAY | Ribosome                             | 24    | 2.7  | 6.30E-08 | 3.4                |

**Cluster E.**

| Category  | GO term                                              | Count | %    | P-value  | Fold of enrichment |
|-----------|------------------------------------------------------|-------|------|----------|--------------------|
| GOTERM_BP | sensory perception of chemical stimulus              | 40    | 7.7  | 1.40E-23 | 7.4                |
| GOTERM_MF | G-protein coupled receptor activity                  | 45    | 8.7  | 2.20E-20 | 5.2                |
| GOTERM_BP | G-protein coupled receptor protein signaling pathway | 49    | 9.4  | 3.10E-18 | 4.3                |
| GOTERM_CC | integral to membrane                                 | 71    | 13.7 | 1.30E-09 | 1.9                |
| GOTERM_CC | intrinsic to membrane                                | 71    | 13.7 | 1.40E-09 | 1.9                |

**Cluster F.**

| Category  | GO term                                          | Count | %    | P-value  | Fold of enrichment |
|-----------|--------------------------------------------------|-------|------|----------|--------------------|
| GOTERM_MF | oxidoreductase activity                          | 37    | 10.3 | 6.80E-05 | 2                  |
| GOTERM_MF | oxidoreductase activity, acting on NADH or NADPH | 9     | 2.5  | 9.30E-05 | 6.2                |
| GOTERM_CC | intracellular organelle part                     | 63    | 17.6 | 9.70E-05 | 1.5                |
